# Supplementary material for: Health and climate impacts of policy-driven changes in open crop straw burning during China's summer harvest
Source: Royal Society of Chemistry journal article supplement (doi:10.1039/d5ea00164a), 2026-01-01
Supplement: d5ea00164a1.pdf [file d5ea00164a1.pdf]

SUPPLEMENTAL INFORMATION

**Health and climate impacts of policy-driven changes in open crop  
straw burning during China's summer harvest**

Jieyu Wen<sup>a</sup>, Zhicheng Feng<sup>a</sup>, Haochen Zuo<sup>a</sup>, Xiaodong Xie<sup>a</sup>, Ying Zhou<sup>b,\*</sup>, Yiyi Wang<sup>c</sup>, Yang Hu<sup>c</sup>, and  
Jianlin Hu<sup>a,\*</sup>

<sup>a</sup> Jiangsu Key Laboratory of Atmospheric Environment Monitoring and Pollution Control, Collaborative  
Innovation Center of Atmospheric Environment and Equipment Technology, School of Environmental  
Science and Engineering, Nanjing University of Information Science & Technology, Nanjing, 210044,  
China

<sup>b</sup> Key Laboratory of Beijing on Regional Air Pollution Control, College of Environment Science and  
Engineering, Beijing University of Technology, Beijing, 100124, China

<sup>c</sup> School of Energy and Environment, Anhui University of Technology, Ma'anshan 243000, China

\*Corresponding authors:

Dr. Jianlin Hu: jianlinhu@nuist.edu.cn

Dr. Ying Zhou: y.zhou@bjut.edu.cn

The supporting information includes 16 pages, 1 text, 9 figures, and 4 tables.

**Text S1. Evaluation of WRF-Chem performance using surface meteorological and air-quality observations**

We evaluated the model performance for meteorological variables in 2018 and 2021 (Fig. S4). Specifically, simulated 2 m air temperature ( $T_2$ ), 2 m relative humidity (RH), and 10 m wind speed (WS) are generally consistent with observations. For  $T_2$ , the mean bias (MB), mean absolute error (MAE), and index of agreement (IOA) are  $-0.37$ ,  $1.43$ , and  $0.94$  in 2018. In 2021, the corresponding values are  $-0.41$ ,  $1.63$ , and  $0.92$ . For RH, the IOA is  $0.89$  in 2018 and  $0.88$  in 2021. For WS, MB, MAE, root-mean-square error (RMSE), and IOA are  $0.12$ ,  $0.91$ ,  $1.19$ , and  $0.77$  in 2018 and  $0.08$ ,  $0.87$ ,  $1.13$ , and  $0.76$  in 2021, respectively. All statistics satisfy the performance goals recommended by Emery et al.<sup>1</sup> ( $T_2$ :  $MB \leq \pm 0.50$ ,  $MAE \leq 2$ ,  $IOA \geq 0.80$ ; RH:  $IOA \geq 0.60$ ; WS:  $MB \leq \pm 0.50$ ,  $MAE \leq 2$ ,  $RMSE \leq 2$ ,  $IOA \geq 0.60$ ). These results indicate that the model reasonably represents near-surface meteorological conditions over mainland China, supporting the quantification of OCSB impacts on air quality.

We also assessed model performance for  $PM_{2.5}$ , maximum daily 8-hour average ozone (MDA8  $O_3$ ), nitrogen dioxide ( $NO_2$ ), and sulfur dioxide ( $SO_2$ ) for 2013, 2018, and 2021 (Figs. S5–S6). For  $PM_{2.5}$ , normalized mean bias (NMB) is  $-10\%$ ,  $-5\%$ , and  $22\%$  in 2013, 2018, and 2021, with normalized mean errors (NME) of  $43\%$ ,  $43\%$ , and  $52\%$ , and correlation coefficients ( $R$ ) of  $0.66$ ,  $0.59$ , and  $0.54$ , respectively. These metrics meet the criteria recommended by Emery et al.<sup>2</sup> ( $NMB \leq \pm 30\%$ ,  $NME \leq 50\%$ ,  $R > 0.40$ ) in 2013 and 2018, with the 2021 NME still close to the 50% benchmark. For MDA8  $O_3$ , the evaluation indicates a systematic underestimation, particularly in 2018 and 2021 ( $NMB = -30\%$  and  $-24\%$ ), while the overall correlation with observations remains reasonable ( $R = 0.74$  in both years). In addition, spatial comparisons further indicate that the model captures the main observed regional patterns of surface concentrations of key pollutants, including the contrast between heavily polluted areas (such as the North China Plain and adjacent regions) and relatively clean regions. Overall, the simulations show acceptable performance in reproducing both meteorology and key pollutant concentrations over mainland China, supporting the subsequent quantification of OCSB impacts.

46 **Table S1.** Model configurations of WRF-Chem.

| Items                    | WRF-Chem                                                                                        | References                         |
|--------------------------|-------------------------------------------------------------------------------------------------|------------------------------------|
| Micro Physics            | The Purdue Lin                                                                                  | (Chen et al, 2002) <sup>3</sup>    |
| Planetary Boundary Layer | The Yonsei University Scheme (YSU)                                                              | (Hong et al, 2006) <sup>4</sup>    |
| Cumulus Parameterization | Grell 3D                                                                                        | (Grell et al, 2002) <sup>5</sup>   |
| Shortwave radiation      | RRTMG                                                                                           | (Iacono et al, 2008) <sup>6</sup>  |
| Longwave radiation       | RRTMG                                                                                           | (Iacono et al, 2008) <sup>6</sup>  |
| Land surface             | Noah                                                                                            | (Tewari et al, 2004) <sup>7</sup>  |
| Surface Layer            | Revised MM5                                                                                     | (Jimenez et al, 2012) <sup>8</sup> |
| Gas-phase chemistry      | Carbon-Bond Mechanism version Z<br>(CBMZ)                                                       | (Zaveri et al, 1999) <sup>9</sup>  |
| Aerosol module           | the 8-bin version of the Model for<br>Simulating Aerosol Interactions and<br>Chemistry (MOSAIC) | (Zaveri et al, 2008) <sup>10</sup> |

47

**Table S2.** The statistical metrics and corresponding calculation formulas used in this study.

| Statistical metric (abbrev.)  | Formula <sup>a</sup>                                                                                                              |
|-------------------------------|-----------------------------------------------------------------------------------------------------------------------------------|
| Mean bias (MB)                | $\frac{1}{N} \sum_{i=1}^N (P_i - O_i)$                                                                                            |
| Mean absolute error (MAE)     | $\frac{1}{N} \sum_{i=1}^N  P_i - O_i $                                                                                            |
| Root-mean-square error (RMSE) | $\left[ \frac{1}{N} \sum_{i=1}^N (P_i - O_i)^2 \right]^{\frac{1}{2}}$                                                             |
| Index of agreement (IOA)      | $1 - \frac{\sum_{i=1}^N (P_i - O_i)^2}{\sum_{i=1}^N ( P_i - \bar{O}  +  O_i - \bar{O} )^2}$                                       |
| Normalized mean bias (NMB)    | $\frac{\sum_{i=1}^N (P_i - O_i)}{\sum_{i=1}^N O_i} \times 100\%$                                                                  |
| Normalized mean error (NME)   | $\frac{\sum_{i=1}^N  P_i - O_i }{\sum_{i=1}^N O_i} \times 100\%$                                                                  |
| Correlation coefficient (R)   | $\frac{\sum_{i=1}^N (P_i - \bar{P})(O_i - \bar{O})}{\sqrt{\sum_{i=1}^N (P_i - \bar{P})^2} \sqrt{\sum_{i=1}^N (O_i - \bar{O})^2}}$ |

<sup>a</sup>In the equations,  $P_i$  denotes the model-predicted (simulated) value and  $O_i$  the observed value.  $N$  is the number of paired samples, and  $i$  indexes the  $i$ th pair ( $i = 1, \dots, N$ ).  $\bar{P}$  and  $\bar{O}$  are the sample means of the predicted and observed values, respectively.

**Table S3.** The 74 major cities used for model evaluation.

| Region              | City lists                                                                                                                                                                                                                                                                                                                                                                                                  |
|---------------------|-------------------------------------------------------------------------------------------------------------------------------------------------------------------------------------------------------------------------------------------------------------------------------------------------------------------------------------------------------------------------------------------------------------|
| Northeast China (4) | 1. Shenyang, 2. Dalian, 3. Changchun, 4. Harbin                                                                                                                                                                                                                                                                                                                                                             |
| North China (15)    | 5. Beijing, 6. Tianjin, 7. Shijiazhuang, 8. Tangshan, 9. Qinhuangdao, 10. Handan, 11. Xingtai, 12. Baoding, 13. Zhangjiakou, 14. Chengde, 15. Cangzhou, 16. Langfang, 17. Hengshui, 18. Taiyuan, 19. Hohhot                                                                                                                                                                                                 |
| Central China (4)   | 20. Hefei, 21. Nanchang, 22. Zhengzhou, 23. Wuhan                                                                                                                                                                                                                                                                                                                                                           |
| East China (29)     | 24. Shanghai, 25. Nanjing, 26. Wuxi, 27. Xuzhou, 28. Changzhou, 29. Suzhou, 30. Nantong, 31. Lianyungang, 32. Huai'an, 33. Yancheng, 34. Yangzhou, 35. Zhenjiang, 36. Taizhou (Jiangsu), 37. Suqian, 38. Hangzhou, 39. Ningbo, 40. Wenzhou, 41. Jiaxing, 42. Huzhou, 43. Shaoxing, 44. Jinhua, 45. Quzhou, 46. Zhoushan, 47. Taizhou (Zhejiang), 48. Lishui, 49. Fuzhou, 50. Xiamen, 51. Jinan, 52. Qingdao |
| South China (12)    | 53. Changsha, 54. Guangzhou, 55. Shenzhen, 56. Zhuhai, 57. Foshan, 58. Jiangmen, 59. Zhaoqing, 60. Huizhou, 61. Dongguan, 62. Zhongshan, 63. Nanning, 64. Haikou                                                                                                                                                                                                                                            |
| Southwest China (5) | 65. Chongqing, 66. Chengdu, 67. Guiyang, 68. Kunming, 69. Lhasa                                                                                                                                                                                                                                                                                                                                             |
| Northwest China (5) | 70. Xi'an, 71. Lanzhou, 72. Xining, 73. Yinchuan, 74. Ürümqi                                                                                                                                                                                                                                                                                                                                                |

**Table S4.** Definition of four analysis regions and province lists.

| <b>Region</b>   | <b>Provinces</b>                                              |
|-----------------|---------------------------------------------------------------|
| North China     | Beijing, Tianjin, Hebei, Shanxi, Inner Mongolia               |
| East China      | Shanghai, Jiangsu, Zhejiang, Anhui, Fujian, Jiangxi, Shandong |
| Central China   | Henan, Hubei, Hunan                                           |
| Northeast China | Liaoning, Jilin, Heilongjiang                                 |

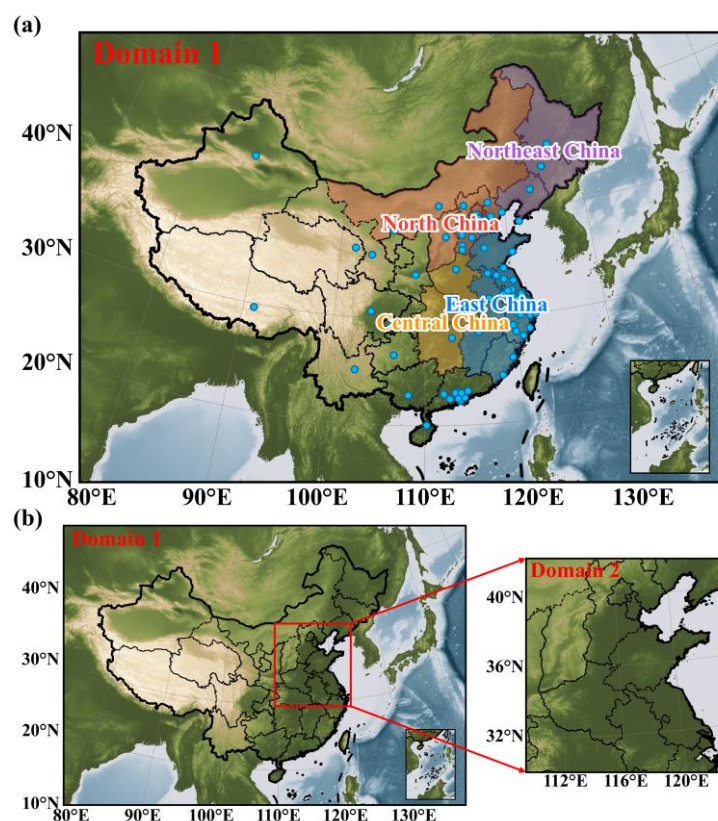

**Fig. S1** WRF-Chem modeling configuration and evaluation sites. (a) Four key analysis regions (Northeast China, North China, East China, and Central China) and the 74 cities used for model evaluation (Table S3; blue dots denote evaluation sites). (b) Outer (Domain 1) and nested (Domain 2) WRF-Chem domains covering China and the North China Plain.

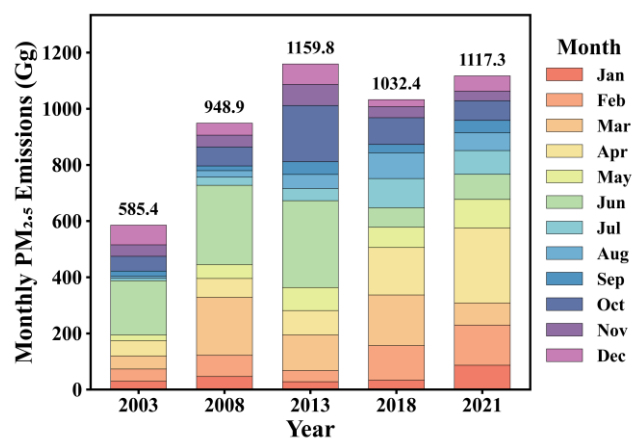

**Fig. S2** Monthly OCSB-induced PM<sub>2.5</sub> emissions over mainland China for 2003, 2008, 2013, 2018 and 2021.



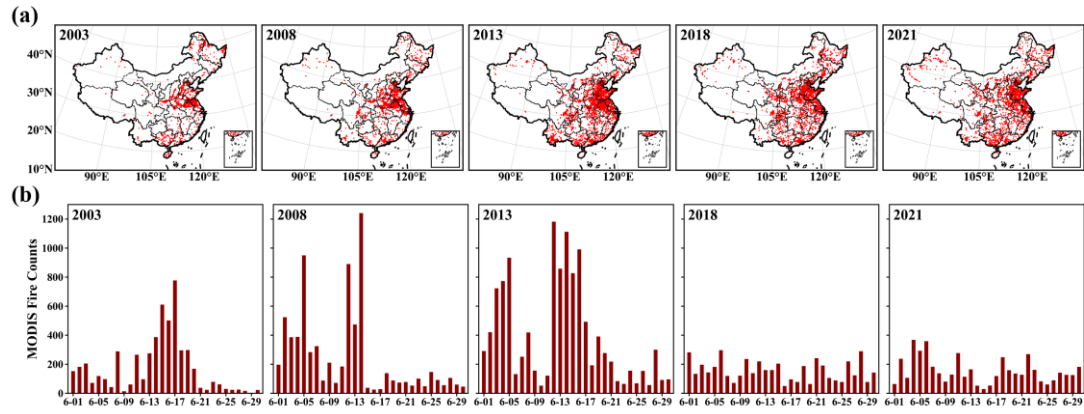

**Fig. S3** Spatial distribution (a) and daily counts (b) of MODIS active-fire detections for June 2003, 2008, 2013, 2018, and 2021 across mainland China.

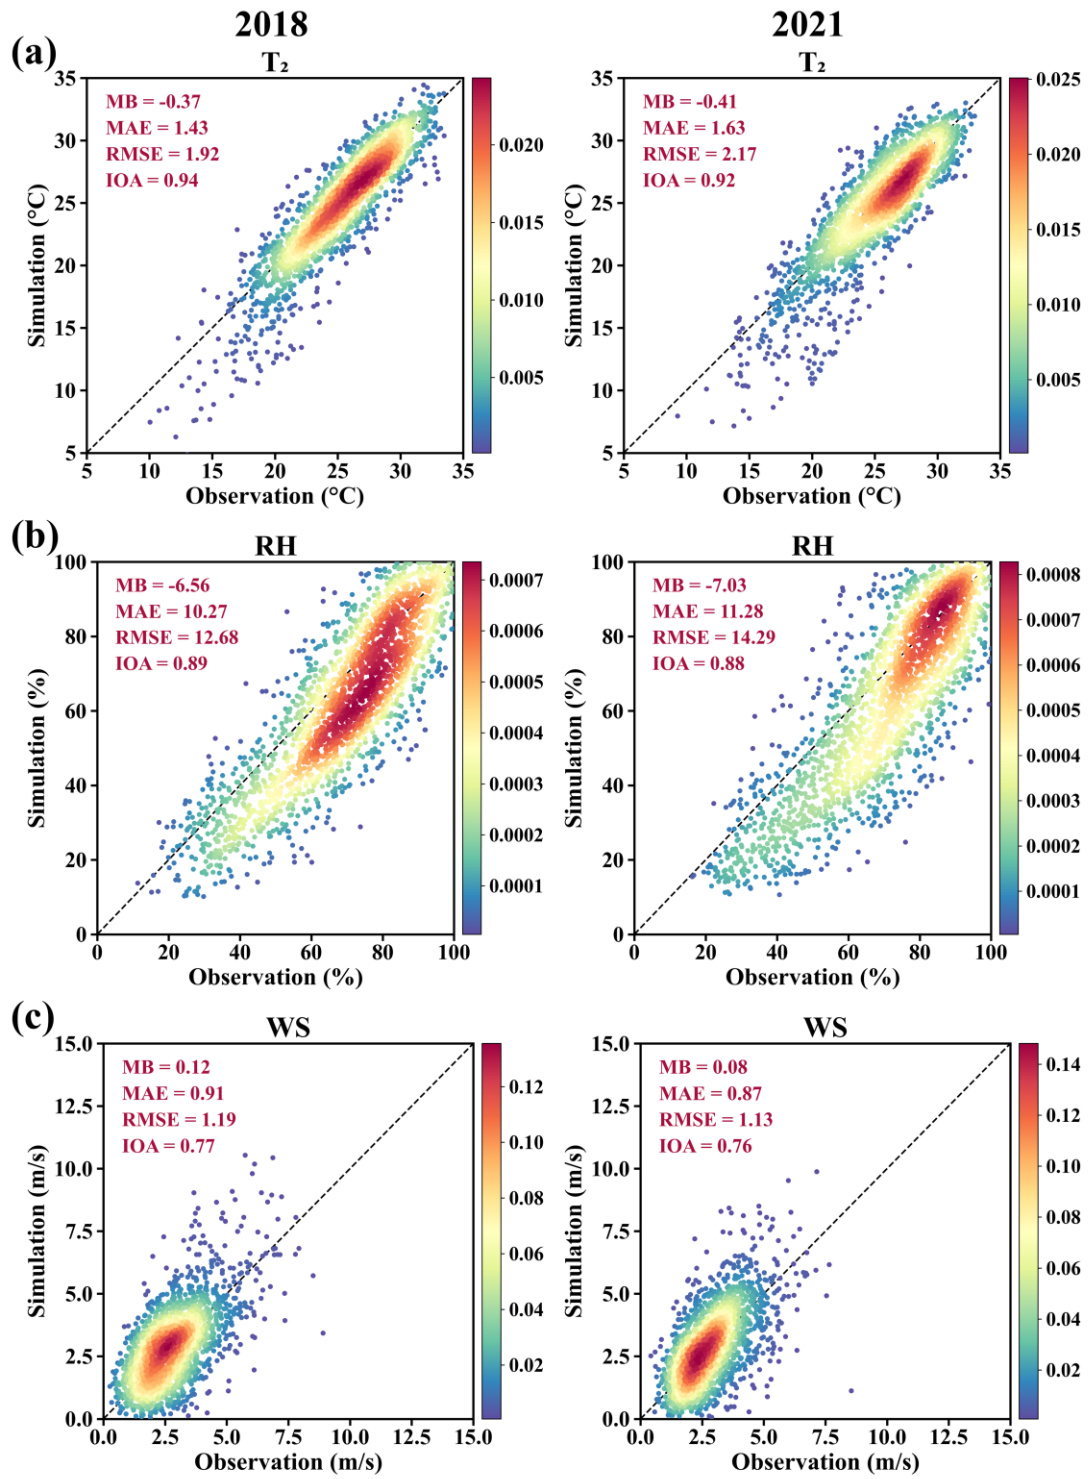

**Fig. S4** Evaluation of T<sub>2</sub>, RH, and WS against observations for June 2018 (left) and June 2021 (right) across 74 cities. (Colors show point density; the dashed line is 1:1.)

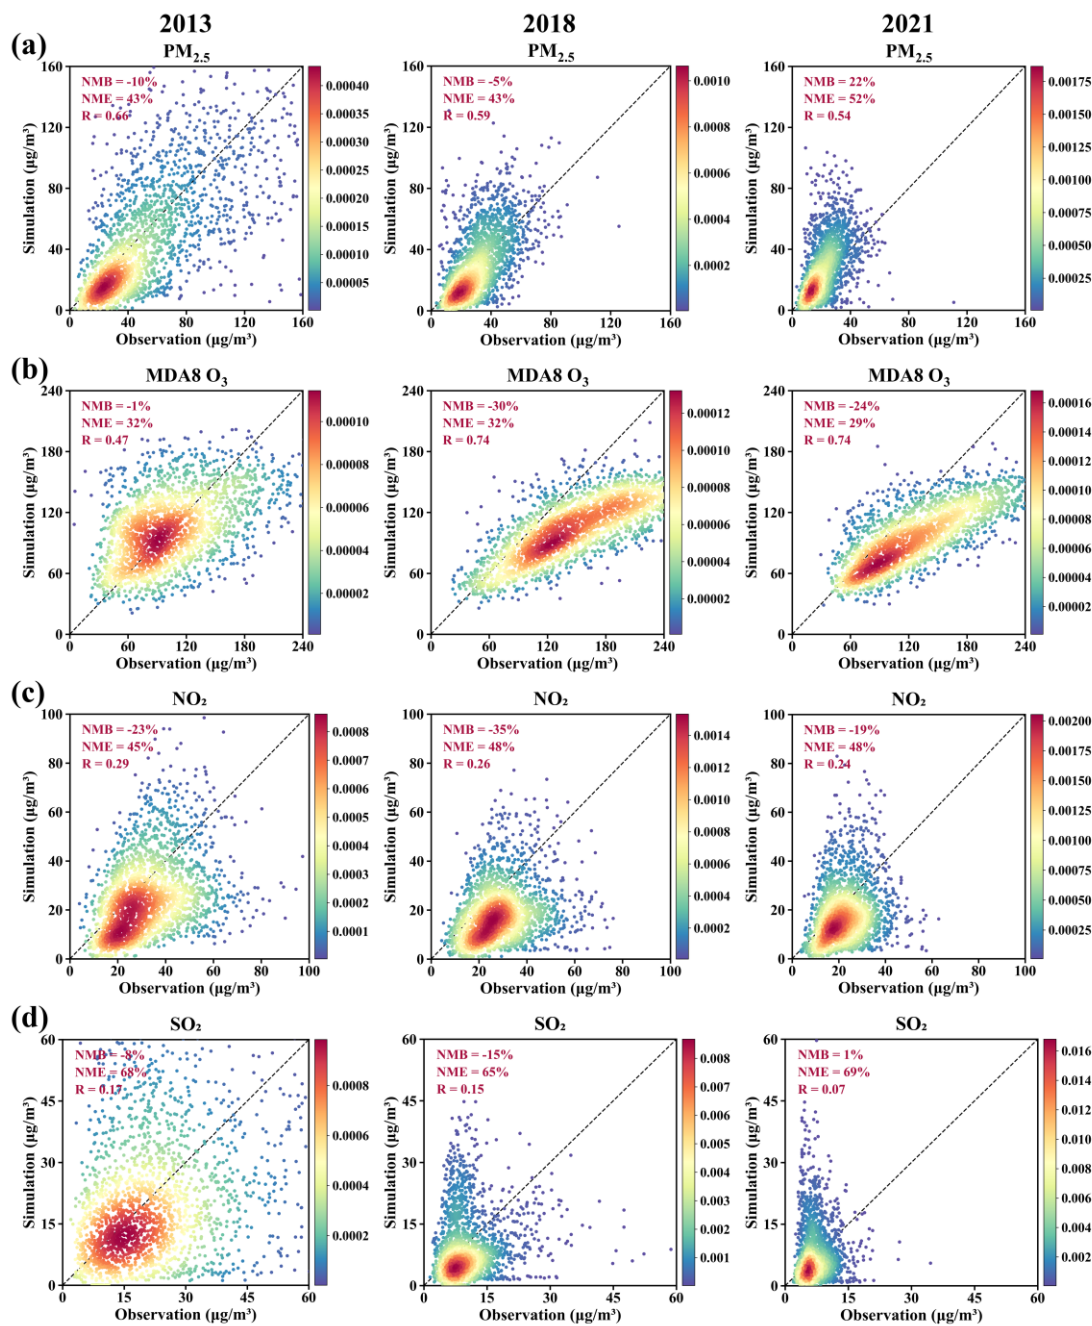

**Fig. S5** Evaluation of PM<sub>2.5</sub>, MDA8 O<sub>3</sub>, NO<sub>2</sub>, and SO<sub>2</sub> against observations for June 2013 (left), 2018 (middle), and 2021 (right) across 74 cities. (Colors show point density; the dashed line is 1:1.)

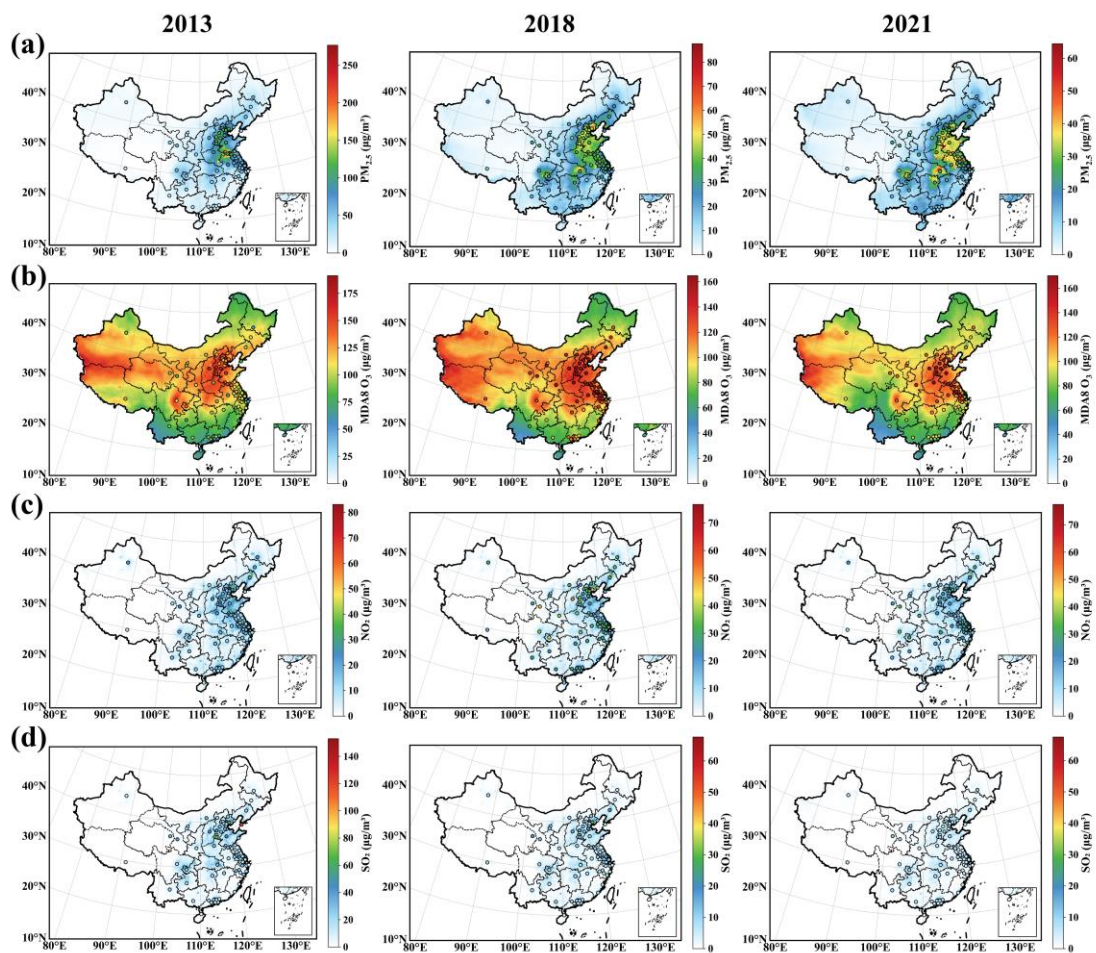

**Fig. S6** Spatial evaluation of PM<sub>2.5</sub>, MDA8 O<sub>3</sub>, NO<sub>2</sub>, and SO<sub>2</sub> across mainland China for June 2013 (left), 2018 (middle), and 2021 (right). (Dots denote observed concentrations at city sites.)

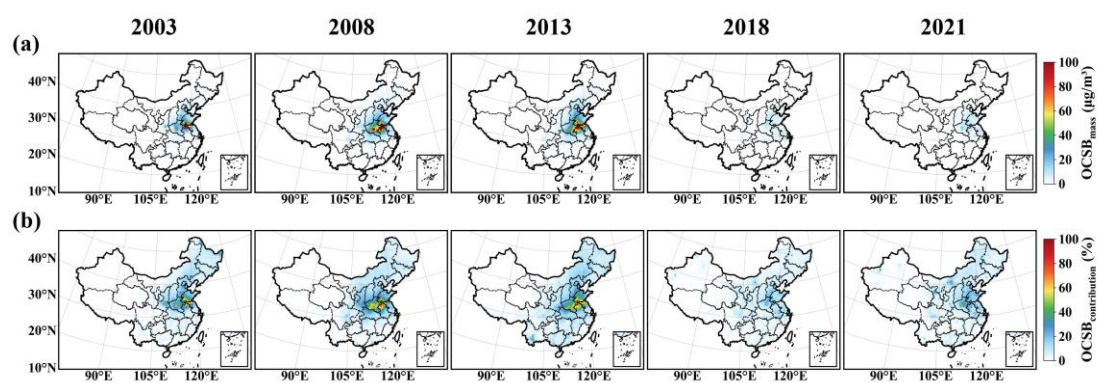

**Fig. S7** Contribution of open crop straw burning (OCSB) to  $\text{PM}_{2.5}$  mass concentration across mainland China for June 2003, 2008, 2013, 2018, and 2021. (a) absolute concentration ( $\mu\text{g}/\text{m}^3$ ); (b) relative contribution (%).

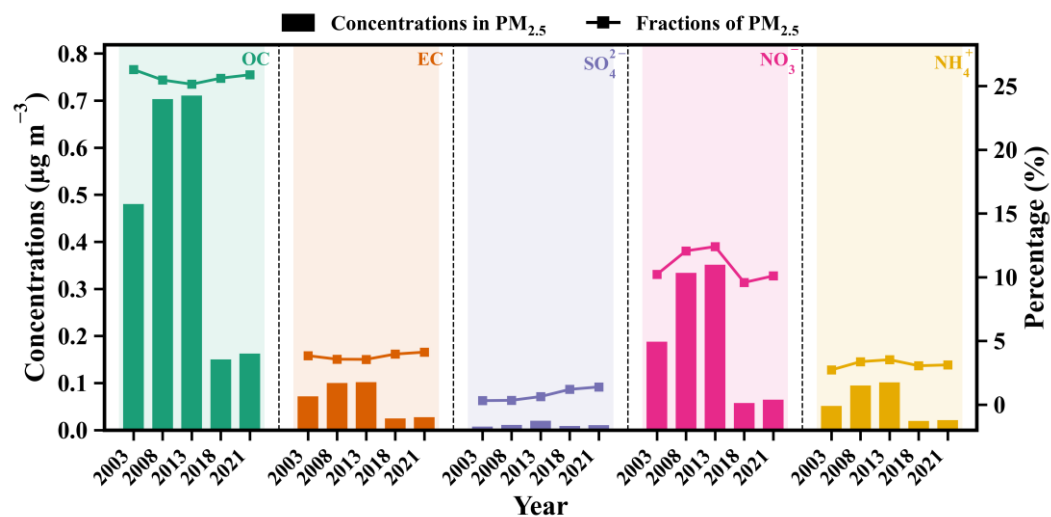

**Fig. S8** Absolute concentrations (bars, left axis) and fractions (lines, right axis) of major PM<sub>2.5</sub> components within OCSB-attributable PM<sub>2.5</sub> in June for 2003, 2008, 2013, 2018, and 2021.

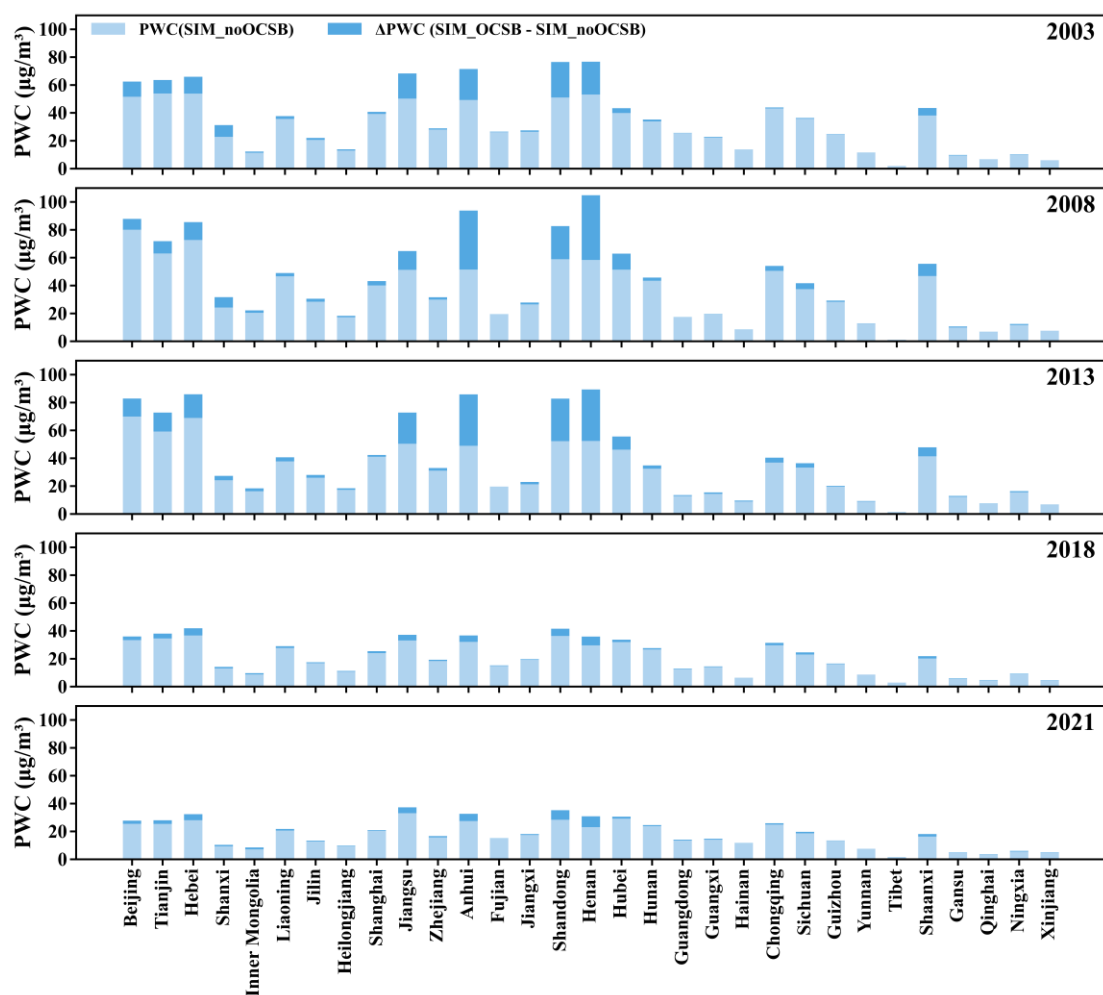

**Fig. S9** Population-weighted PM<sub>2.5</sub> concentration (PWC) across 31 provinces of mainland China for June 2003, 2008, 2013, 2018, and 2021.



## References

- 1 C. Emery, E. Tai and G. Yarwood, Enhanced meteorological modeling and performance evaluation for two Texas ozone episodes, Prepared for the Texas natural resource conservation commission, by ENVIRON International Corporation, 2001, **161**.
- 2 C. Emery, Z. Liu, A. G. Russell, M. T. Odman, G. Yarwood and N. Kumar, Recommendations on statistics and benchmarks to assess photochemical model performance, Journal of the Air & Waste Management Association, 2017, **67**, 582-598.
- 3 S. H. Chen and W. Y. Sun, A one-dimensional time dependent cloud model, Journal of the Meteorological Society of Japan, 2002, **80**, 99-118.
- 4 S.-Y. Hong, Y. Noh and J. Dudhia, A new vertical diffusion package with an explicit treatment of entrainment processes, Monthly Weather Review, 2006, **134**, 2318-2341.
- 5 G. A. Grell, Prognostic evaluation of assumptions used by cumulus parameterizations, Monthly weather review, 1993, **121**, 764-787.
- 6 M. J. Iacono, J. S. Delamere, E. J. Mlawer, M. W. Shephard, S. A. Clough and W. D. Collins, Radiative forcing by long-lived greenhouse gases: Calculations with the AER radiative transfer models, Journal of Geophysical Research: Atmospheres, 2008, **113**.
- 7 M. Tewari, Implementation and verification of the unified NOAA land surface model in the WRF model, In 20th Conference on Weather Analysis and Forecasting/16th Conference on Numerical Weather Prediction; AMS: Seattle, WA, USA, 2004, **Vol. 14.2A**, pp 11-15.
- 8 P. A. Jiménez, J. Dudhia, J. F. González-Rouco, J. Navarro, J. P. Montávez and E. García-Bustamante, A revised scheme for the WRF surface layer formulation, Monthly weather review, 2012, **140**, 898-918.
- 9 R. A. Zaveri and L. K. Peters, A new lumped structure photochemical mechanism for large-scale applications, Journal of Geophysical Research: Atmospheres, 1999, **104**, 30387-30415.
- 10 R. A. Zaveri, R. C. Easter, J. D. Fast and L. K. Peters, Model for Simulating Aerosol Interactions and Chemistry (MOSAIC), Journal of Geophysical Research: Atmospheres, 2008, **113**.
